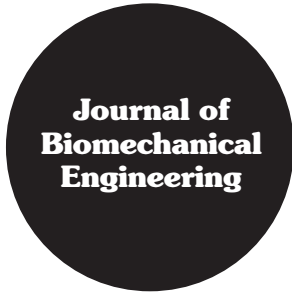

# Editorial

## 2019 Editors' Choice Papers

As part of the Annual Special Issue, the JBME Associate Editors selected the top papers published in the journal during 2019. Those Editors' Choice papers, listed below in chronological order, exemplified both the high quality and the breadth of papers published in the journal. Congratulations to these authors and to all authors whose work appeared in JBME over the past year!

Barone, W. R., Knight, K. M., Moalli, P. A., and Abramowitch, S. D., 2019, "Deformation of Transvaginal Mesh in Response to Multiaxial Loading," *ASME J. Biomech. Eng.*, **141**(2), p. 021001.

Cocciolone, A. J., Johnson, E. O., Shao, J.-Y., and Wagenseil, J. E., 2019, "Elastic Fiber Fragmentation Increases Transmural Hydraulic Conductance and Solute Transport in Mouse Arteries," *ASME J. Biomech. Eng.*, **141**(2), p. 021013.

Miramezani, M., Diamond, S. L., Litt, H. I., and Shadden, S. C., 2019, "Reduced Order Models for Transstenotic Pressure Drop in the Coronary Arteries," *ASME J. Biomech. Eng.*, **141**(3), p. 031005.

Zhu, C., Seo, J.-H., and Mittal, R., 2019, "Computational Modeling and Analysis of Murmurs Generated by Modeled Aortic Stenoses," *ASME J. Biomech. Eng.*, **141**(4), p. 041007.

Zhang, S., Vijayavenkataraman, S., Chong, G. L., Fuh, J. Y. H., and Lu, W. F., 2019, "Computational Design and Optimization of Nerve Guidance Conduits for Improved Mechanical Properties and Permeability," *ASME J. Biomech. Eng.*, **141**(5), p. 051007.

Ramo, N. L., Troyer, K. L., and Puttlitz, C. M., 2019, "Comparing Predictive Accuracy and Computational Costs for Viscoelastic Modeling of Spinal Cord Tissues," *ASME J. Biomech. Eng.*, **141**(5), p. 051009.

Ramasubramanian, A., Capaldi, X., Bradner, S. A., and Gangi, L., 2019, "On the Biomechanics of Cardiac S-Looping: Insights From Modeling and Perturbation Studies," *ASME J. Biomech. Eng.*, **141**(5), p. 051011.

Gan, R. Z., and Jiang, S., 2019, "Surface Motion Changes of Tympanic Membrane Damaged by Blast Waves," *ASME J. Biomech. Eng.*, **141**(9), p. 091009.

Malone, F., McCarthy, E., Delassus, P., Buhk, J. H., Fiehler, J., and Morris, L., 2019, "Embolus Analogue Trajectory Paths Under Physiological Flowrates Through Patient Specific Aortic Arch Models," *ASME J. Biomech. Eng.*, **141**(10), p. 101007.

Singh, A., Ferry, D., and Balasubramanian, S., 2019, "Efficacy of Clinical Simulation-Based Training in Biomedical Education," *ASME J. Biomech. Eng.*, **141**(12), p. 121011.
